# Supplementary material
Source: Springer Nature journal article supplement (https://www.springermedizin.de/resource/supplementary/12901_2012_84_MOESM2_ESM.pdf/9515208)
Supplement: MOESM2 [file 9515208]

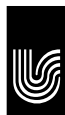

**VERTIGO SYMPTOM SCALE (VSS-G)  
SYMPTOME BEI SCHWINDEL**

**Anleitung:**

Bitte kreuzen Sie die entsprechende Spalte an, um damit anzugeben, wie oft jedes der unten aufgeführten Symptome während der letzten 12 Monate aufgetreten ist. Falls Sie seit weniger als einem Jahr unter Schwindel leiden, geben Sie bitte an, wie oft jedes der unten aufgeführten Symptome seither aufgetreten ist.

Mögliche Antworten sind:

|            |                                                   |                                                     |                                                                              |                                                                           |
|------------|---------------------------------------------------|-----------------------------------------------------|------------------------------------------------------------------------------|---------------------------------------------------------------------------|
| <b>nie</b> | <b>wenige Male</b><br>=<br><b>1-3 Mal im Jahr</b> | <b>mehrere Male</b><br>=<br><b>4-12 Mal im Jahr</b> | <b>ziemlich oft</b><br>=<br><b>durchschnittlich mehr als einmal im Monat</b> | <b>sehr oft</b><br>=<br><b>durchschnittlich mehr als einmal die Woche</b> |
|------------|---------------------------------------------------|-----------------------------------------------------|------------------------------------------------------------------------------|---------------------------------------------------------------------------|

Wie oft traten bei Ihnen **in den letzten 12 Monaten** folgende Symptome auf?

|                                                                                                        | nie                      | wenige Male              | mehrere Male             | ziemlich oft             | sehr oft                 |
|--------------------------------------------------------------------------------------------------------|--------------------------|--------------------------|--------------------------|--------------------------|--------------------------|
| 1a. Ein Gefühl, dass sich Dinge bewegen oder drehen, welches <b>weniger als 2 Minuten</b> dauerte      | <input type="checkbox"/> | <input type="checkbox"/> | <input type="checkbox"/> | <input type="checkbox"/> | <input type="checkbox"/> |
| 1b. Ein Gefühl, dass sich Dinge bewegen oder drehen, welches <b>bis zu 20 Minuten</b> dauerte          | <input type="checkbox"/> | <input type="checkbox"/> | <input type="checkbox"/> | <input type="checkbox"/> | <input type="checkbox"/> |
| 1c. Ein Gefühl, dass sich Dinge bewegen oder drehen, welches <b>20 Minuten bis zu 1 Stunde</b> dauerte | <input type="checkbox"/> | <input type="checkbox"/> | <input type="checkbox"/> | <input type="checkbox"/> | <input type="checkbox"/> |
| 1d. Ein Gefühl, dass sich Dinge bewegen oder drehen, welches <b>mehrere Stunden</b> dauerte            | <input type="checkbox"/> | <input type="checkbox"/> | <input type="checkbox"/> | <input type="checkbox"/> | <input type="checkbox"/> |
| 1e. Ein Gefühl, dass sich Dinge bewegen oder drehen, welches <b>mehr als 12 Stunden</b> dauerte        | <input type="checkbox"/> | <input type="checkbox"/> | <input type="checkbox"/> | <input type="checkbox"/> | <input type="checkbox"/> |
| 2. Schmerzen in der Herz- oder Brustgegend                                                             | <input type="checkbox"/> | <input type="checkbox"/> | <input type="checkbox"/> | <input type="checkbox"/> | <input type="checkbox"/> |
| 3. Vorübergehende Hitze- oder Kältegefühle                                                             | <input type="checkbox"/> | <input type="checkbox"/> | <input type="checkbox"/> | <input type="checkbox"/> | <input type="checkbox"/> |
| 4. Ein so starkes Schwanken, dass Sie wirklich stürzten                                                | <input type="checkbox"/> | <input type="checkbox"/> | <input type="checkbox"/> | <input type="checkbox"/> | <input type="checkbox"/> |

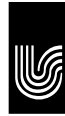

|                                                                                                                 | nie                      | wenige Male              | mehrere Male             | ziemlich oft             | sehr oft                 |
|-----------------------------------------------------------------------------------------------------------------|--------------------------|--------------------------|--------------------------|--------------------------|--------------------------|
| 5. Übelkeit; ein Gefühl, dass sich der Magen umdreht                                                            | <input type="checkbox"/> | <input type="checkbox"/> | <input type="checkbox"/> | <input type="checkbox"/> | <input type="checkbox"/> |
| 6. Verspannung / Schmerzhaftigkeit der Muskeln                                                                  | <input type="checkbox"/> | <input type="checkbox"/> | <input type="checkbox"/> | <input type="checkbox"/> | <input type="checkbox"/> |
| 7a. Sich benommen, schwebend oder schwindlig zu fühlen. Dieses Gefühl dauerte <b>weniger als 2 Minuten</b>      | <input type="checkbox"/> | <input type="checkbox"/> | <input type="checkbox"/> | <input type="checkbox"/> | <input type="checkbox"/> |
| 7b. Sich benommen, schwebend oder schwindlig zu fühlen. Dieses Gefühl dauerte <b>bis zu 20 Minuten</b>          | <input type="checkbox"/> | <input type="checkbox"/> | <input type="checkbox"/> | <input type="checkbox"/> | <input type="checkbox"/> |
| 7c. Sich benommen, schwebend oder schwindlig zu fühlen. Dieses Gefühl dauerte <b>20 Minuten bis zu 1 Stunde</b> | <input type="checkbox"/> | <input type="checkbox"/> | <input type="checkbox"/> | <input type="checkbox"/> | <input type="checkbox"/> |
| 7d. Sich benommen, schwebend oder schwindlig zu fühlen. Dieses Gefühl dauerte <b>mehrere Stunden</b>            | <input type="checkbox"/> | <input type="checkbox"/> | <input type="checkbox"/> | <input type="checkbox"/> | <input type="checkbox"/> |
| 7e. Sich benommen, schwebend oder schwindlig zu fühlen. Dieses Gefühl dauerte <b>mehr als 12 Stunden</b>        | <input type="checkbox"/> | <input type="checkbox"/> | <input type="checkbox"/> | <input type="checkbox"/> | <input type="checkbox"/> |
| 8. Zittern, Frösteln, Schütteln                                                                                 | <input type="checkbox"/> | <input type="checkbox"/> | <input type="checkbox"/> | <input type="checkbox"/> | <input type="checkbox"/> |
| 9. Druckgefühl in einem Ohr oder beiden Ohren                                                                   | <input type="checkbox"/> | <input type="checkbox"/> | <input type="checkbox"/> | <input type="checkbox"/> | <input type="checkbox"/> |
| 10. Herzklopfen, unregelmässiger Herzschlag oder Herzrasen                                                      | <input type="checkbox"/> | <input type="checkbox"/> | <input type="checkbox"/> | <input type="checkbox"/> | <input type="checkbox"/> |
| 11. Erbrechen                                                                                                   | <input type="checkbox"/> | <input type="checkbox"/> | <input type="checkbox"/> | <input type="checkbox"/> | <input type="checkbox"/> |
| 12. Gefühl von Schwere in Armen oder Beinen                                                                     | <input type="checkbox"/> | <input type="checkbox"/> | <input type="checkbox"/> | <input type="checkbox"/> | <input type="checkbox"/> |
| 13. Sehstörungen (z.B. verschwommenes Sehen, Flimmern, Punkte vor den Augen)                                    | <input type="checkbox"/> | <input type="checkbox"/> | <input type="checkbox"/> | <input type="checkbox"/> | <input type="checkbox"/> |
| 14. Kopfschmerzen oder Druckgefühl im Kopf                                                                      | <input type="checkbox"/> | <input type="checkbox"/> | <input type="checkbox"/> | <input type="checkbox"/> | <input type="checkbox"/> |



|                                                                                                                                                    | nie                      | wenige Male              | mehrere Male             | ziemlich oft             | sehr oft                 |
|----------------------------------------------------------------------------------------------------------------------------------------------------|--------------------------|--------------------------|--------------------------|--------------------------|--------------------------|
| 15. Unfähigkeit ohne Unterstützung richtig zu stehen oder zu gehen                                                                                 | <input type="checkbox"/> | <input type="checkbox"/> | <input type="checkbox"/> | <input type="checkbox"/> | <input type="checkbox"/> |
| 16. Atemschwierigkeiten, Kurzatmigkeit                                                                                                             | <input type="checkbox"/> | <input type="checkbox"/> | <input type="checkbox"/> | <input type="checkbox"/> | <input type="checkbox"/> |
| 17. Konzentrations- oder Gedächtnisstörungen                                                                                                       | <input type="checkbox"/> | <input type="checkbox"/> | <input type="checkbox"/> | <input type="checkbox"/> | <input type="checkbox"/> |
| 18a. Sich unsicher auf den Beinen fühlen; nahe daran sein, das Gleichgewicht zu verlieren. Dieses Gefühl dauerte <b>weniger als 2 Minuten</b>      | <input type="checkbox"/> | <input type="checkbox"/> | <input type="checkbox"/> | <input type="checkbox"/> | <input type="checkbox"/> |
| 18b. Sich unsicher auf den Beinen fühlen; nahe daran sein, das Gleichgewicht zu verlieren. Dieses Gefühl dauerte <b>bis zu 20 Minuten</b>          | <input type="checkbox"/> | <input type="checkbox"/> | <input type="checkbox"/> | <input type="checkbox"/> | <input type="checkbox"/> |
| 18c. Sich unsicher auf den Beinen fühlen; nahe daran sein, das Gleichgewicht zu verlieren. Dieses Gefühl dauerte <b>20 Minuten bis zu 1 Stunde</b> | <input type="checkbox"/> | <input type="checkbox"/> | <input type="checkbox"/> | <input type="checkbox"/> | <input type="checkbox"/> |
| 18d. Sich unsicher auf den Beinen fühlen; nahe daran sein, das Gleichgewicht zu verlieren. Dieses Gefühl dauerte <b>mehrere Stunden</b>            | <input type="checkbox"/> | <input type="checkbox"/> | <input type="checkbox"/> | <input type="checkbox"/> | <input type="checkbox"/> |
| 18e. Sich unsicher auf den Beinen fühlen; nahe daran sein, das Gleichgewicht zu verlieren. Dieses Gefühl dauerte <b>mehr als 12 Stunden</b>        | <input type="checkbox"/> | <input type="checkbox"/> | <input type="checkbox"/> | <input type="checkbox"/> | <input type="checkbox"/> |
| 19. Kribbeln, Prickeln oder Taubheitsgefühl in einzelnen Körperteilen                                                                              | <input type="checkbox"/> | <input type="checkbox"/> | <input type="checkbox"/> | <input type="checkbox"/> | <input type="checkbox"/> |
| 20. Schmerzen im unteren Teil des Rückens                                                                                                          | <input type="checkbox"/> | <input type="checkbox"/> | <input type="checkbox"/> | <input type="checkbox"/> | <input type="checkbox"/> |
| 21. Übermässiges Schwitzen                                                                                                                         | <input type="checkbox"/> | <input type="checkbox"/> | <input type="checkbox"/> | <input type="checkbox"/> | <input type="checkbox"/> |
| 22. Schwarz werden vor den Augen; kurz davor, ohnmächtig zu werden                                                                                 | <input type="checkbox"/> | <input type="checkbox"/> | <input type="checkbox"/> | <input type="checkbox"/> | <input type="checkbox"/> |
